## Oxygen kinetics during CXL using symmetrically and asymmetrically pulsed UV-irradiation

Maria A. Komninou, MSc<sup>1,2,A</sup>

Malavika H. Nambiar, MSc<sup>3,A</sup>

Beatrice E. Frueh, MD<sup>1</sup>

Volker Enzmann, PhD<sup>1,4</sup>

Philippe Buehler, PhD<sup>3</sup>

Theo G. Seiler, MD<sup>1,5,6,7</sup>

From the Dept. of Ophthalmology, University Hospital Bern, University of Bern, Bern, Switzerland<sup>1</sup>, Graduate School for Cellular and Biomedical Sciences, University of Bern, Switzerland<sup>2</sup>, ARTORG Center for Biomedical Engineering Research, University of Bern, Bern, Switzerland<sup>3</sup>, Dept. Of BioMedical Research, University of Bern, Bern, Switzerland<sup>4</sup>, Klinik für Augenheilkunde, Universitätsklinikum Düsseldorf, Düsseldorf, Germany<sup>5</sup>, Institut für Refraktive und Ophthalmochirurgie (IROC), Zürich, Switzerland<sup>6</sup> and the Wellman Center for Photomedicine - Massachusetts General Hospital, Harvard Medical School, 50 Blossom Street, 02114 Boston, MA<sup>7</sup>

None of the authors has any financial interest

Corr. author: Theo G. Seiler, MD, Universitätsklinik für Augenheilkunde, Inselspital,  
Universität Bern, 3010 Bern, Switzerland, Tel. +41 76 46 05 32, Fax +41 31  
381 70 66, Email: theo@seiler.tv

**Key words:** Oxygen, Cross-linking, CXL, Kinetics, Cornea, Pulsing

<sup>A</sup> MAK and MHN have contributed equally to this work

## Abstract

**Purpose:** To investigate oxygen kinetics during symmetrically pulsed and asymmetrically pulsed crosslinking (p-CXL) with and without supplementary oxygen at different irradiances and corneal depths.

**Design:** Experimental, laboratory study

**Methods:** In de-epithelialized porcine eyes, a femtosecond-laser generated tunnel was used to place a fibre-probe in corneal depths of 200 and 300  $\mu\text{m}$  to measure the local oxygen concentration. After riboflavin imbibition, the corneas were irradiated at 9, 18 and 30  $\text{mW}/\text{cm}^2$  for 10 seconds On and 10 seconds Off; while the oxygen concentration was continuously measured until oxygen levels depleted below the oxygen sensor's threshold (1%) or until stabilized. All experiments were performed under normoxic (21%) and hyperoxic (>95%) conditions and the obtained data were used to identify parameters of a numerical algorithm for oxygen consumption and diffusion. Following the algorithm's development, the suggested asymmetrical pulsing values were experimentally tested. For 9, 18 and 30  $\text{mW}/\text{cm}^2$  the suggested tested pulsing schemes were 3 seconds On : 9 seconds Off, 2 seconds On : 9 seconds Off and 1 second On : 9 seconds Off respectively.

**Results:** The minimum, available stromal oxygen for p-CXL in normoxic environment was decreasing <1% for 9, 18 and 30  $\text{mW}/\text{cm}^2$  in 200 and 300  $\mu\text{m}$ . Using optimized p-CXL, the minimum available oxygen increased to 3.8, 1.8 and 2.8 % at 200  $\mu\text{m}$ , for irradiances of 9, 18 and 30  $\text{mW}/\text{cm}^2$ , respectively, where the periods exhibited an equilibrium state. At 300  $\mu\text{m}$ , 1.1 % of oxygen was available for 30  $\text{mW}/\text{cm}^2$ . Using a hyperoxic environment, the oxygen concentration was 19.2% using 9  $\text{mW}/\text{cm}^2$  in 200  $\mu\text{m}$ , dropping to 17.0% in 300  $\mu\text{m}$ . At 18  $\text{mW}/\text{cm}^2$ , the concentrations were 3.9% and 1% in 200 and 300  $\mu\text{m}$ , respectively. Using 30

mW/cm<sup>2</sup>, all oxygen was depleted below the threshold limit (1% O<sub>2</sub>) for both depths. Using optimized pulsing in combination with hyperoxic environment, the oxygen concentration was 42.0% using 9 mW/cm<sup>2</sup> in 200 μm and 43.3% in 300 μm. At 18 mW/cm<sup>2</sup>, the concentrations were 24.7% and 16.1% in 200 and 300 μm, respectively. Using 30 mW/cm<sup>2</sup>, the minimum oxygen availability was 25.7% and 13.7% in 200 and 300 μm, respectively.

**Conclusion:** Supplementary oxygen during symmetrical and asymmetrical p-CXL increased the oxygen availability during corneal cross-linking. The pulsed irradiance and the hyperoxic environment potentially increased the efficacy of corneal cross-linking in deeper corneal layers and higher irradiances. The numerical algorithm for asymmetrical pulsing led to the quantification of “On” and “Off” times related to different scenarios such as irradiances.

## Introduction

Corneal crosslinking (CXL) is a safe and effective technique to prevent progression of keratectasia such as keratoconus<sup>1,2</sup> or post-LASIK ectasia with low rates of complication<sup>3</sup>. Reactive oxygen species (ROS) are produced when the photosensitizer riboflavin is activated by UV irradiation, forming new bond in the cornea's extracellular matrix<sup>4</sup>. Conventional epithelium-off crosslinking has already demonstrated the safety and long term-efficacy needed for stabilization of progressive keratectasia<sup>5-8</sup>. However, it has been shown that in deeper stromal layers of the cornea, all available O<sub>2</sub> is depleted within seconds and the rediffusion is not sufficient to achieve effective aerobic CXL<sup>9</sup> under normoxic conditions. During the last years, pulsed CXL (p-CXL) has been proposed as an alternative to continuous UV-irradiation considering that the on-off pattern will allow more oxygen to rediffuse into the corneal stroma and will lead to an enhanced delivery of oxygen allowing a more efficient and shorter treatment<sup>10,11</sup>. The theory of acceleration derives from the Bunsen-Roscoe law of reciprocity indicating that the same amount of photochemical reaction can be achieved by increasing UV-A irradiation and reducing time<sup>8</sup>. However, whether pulsed UVA light is more effective than continuous irradiation has not been widely examined and, therefore, remains questionable. Mazzotta et al. reported that the effect of pulsed CXL was superior to continuous CXL, contrariwise Toker et al. reported that there was no statistically significant difference between the 2 groups<sup>12,13</sup>.

The aim of this study was to investigate the oxygen availability, consumption and rediffusion during pulsed CXL under hyperoxic (>95% O<sub>2</sub>) and normoxic (21% O<sub>2</sub>, room air) oxygen conditions at various depths using different irradiances and pulsing schemes, as well as to test an optimized pulsing scheme utilizing a predictive algorithm that could possibly enhance the clinical treatment.

## Materials and Methods

### *Experimental Setup*

The process for sample preparation, oxygen environment and cross-linking has been previously described in detail<sup>9</sup>. For this study, the porcine eyes were divided into following four groups (n = 6 for each group):

1. Symmetrical (10":10") pulsed CXL under normoxic conditions – The UV-irradiation was set to 10 seconds On:10 seconds Off
2. Asymmetrical pulsed CXL in normoxic conditions – The laser was configured to the optimized pulsed protocol (3":9" for 9 mW/cm<sup>2</sup>, 2":9" for 18 mW/cm<sup>2</sup> and 1":9" for 30 mW/cm<sup>2</sup>)
3. Symmetrical (10":10") pulsed CXL in hyperoxic conditions – The laser was set to 10 seconds On:10 seconds Off
4. Asymmetrical pulsed CXL under hyperoxic conditions– The laser was configured to the optimized pulsed protocol (3":9" for 9 mW/cm<sup>2</sup>, 2":9" for 18 mW/cm<sup>2</sup> and 1":9" for 30 mW/cm<sup>2</sup>)

The groups were subjected to CXL in an atmospheric and hyperoxic environment in corneal depths of 200 and 300  $\mu\text{m}$  (Table 1). For more accurate data, the optic oxygen micro-sensor (NTH-PSt1; PreSens, Regensburg, Germany), connected to a microfiber optic oxygen meter (Micro TX3; PreSens) measured one data point per second. All investigated groups received epithelial removal, followed by the application of 0.1% riboflavin (Vibex Rapid, Avedro, Waltham, MA, USA) every 2 minutes for a total of 10 minutes and irradiation. Thereby, the UV-source (PXL Platinum 330, PeschkeTrade, Huenenberg, Switzerland) was focused onto the surface of the cornea delivering irradiances of 9, 18 and 30 mW/cm<sup>2</sup>. For both sets of experiments, the UV-irradiance was delivered in a pulsed form and the oxygen measurements were recorded until the oscillation period was constant.

### *Statistical analysis*

The figures creation, boxplot representation and average minimum and maximum values of the data were calculated using the Python programming language and the libraries matplotlib and plotly. Statistical analysis of the results was performed using a one-way ANOVA including Bonferroni's post-hoc analysis (IBM SPSS Statistics Corp., Armonk, NY, USA). The p-values less than 0.05 were considered to indicate a statistical significance.

### *Numerical Setup*

Based on experimental data previously collected with continuous laser irradiations<sup>9</sup>, a pulsatile algorithm of O<sub>2</sub> diffusion in the cornea was developed. The temporal profile of oxygen depletion during CXL treatment, at different intensities and the profile of oxygen increase, due to rediffusion when the laser was turned off, were used to estimate the oxygen levels at 200 μm and 300 μm for different pulsation strategies. This was done by interpolating the previously recorded oxygen concentration of the constant irradiance with the corresponding oxygen concentration from the "on" and "off" times of the pulsating laser. This algorithm was verified with pulsed CXL data for 10-second-intervals from the "On" and "Off" states. This algorithm was then used to determine the optimal pulse duration by testing different "On" and "Off" states. Since oxygen consumption is directly related to the number of cross-links generated per unit time, the optimal pulse strategy was defined to maximize the oxygen consumption predicted by the algorithm during the laser. The optimization was performed for 200 μm and 300 μm depth for 9, 18, and 30 mW/cm<sup>2</sup> irradiations, respectively. The algorithm was analyzed in 1D using MATLAB®.

## Results

### *Validation of the numerical algorithm against standard pulsed CXL data*

The pulsation algorithm was validated using experimental data with the symmetrical 10":10" p-CXL protocol in normoxic conditions. After oxygen had dropped below the sensor's threshold (Table 2), the numerical predictions were within the standard deviation of the oxygen measurements for the irradiances of 9, 18, and 30 mW/cm<sup>2</sup> at both 200 μm and 300 μm depths (Figure 1). Therefore, the algorithm was then used to determine the pulsation strategy that maximized the oxygen consumption rate, which yielded an optimum of 3 seconds On:9 seconds Off at 9 mW/cm<sup>2</sup>, 2 seconds On:9 seconds Off at 18 mW/cm<sup>2</sup>, and 1 second On:9 seconds Off at 30 mW/cm<sup>2</sup>.

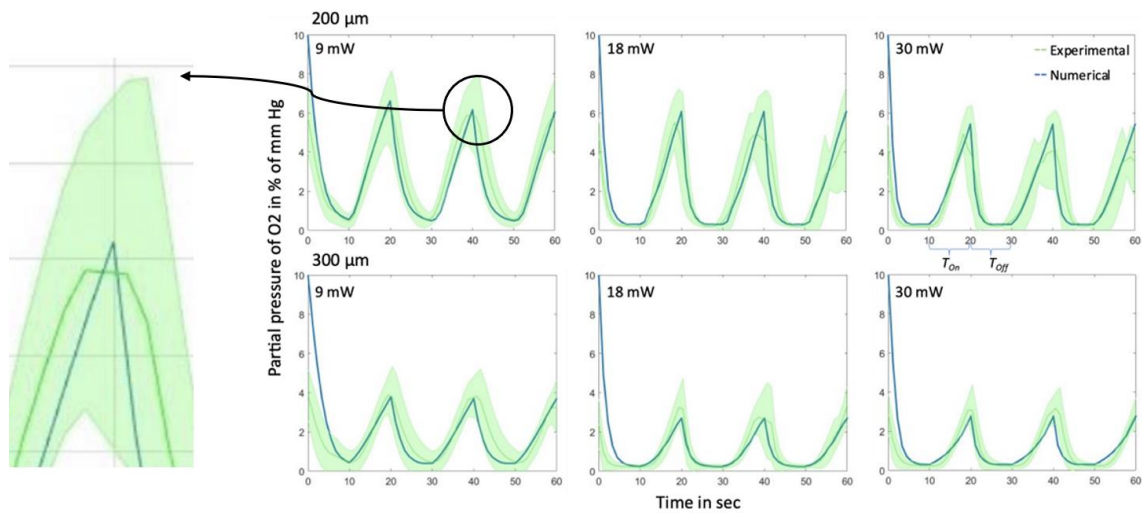

**Figure 1:** Validation of numerical algorithm against symmetrical (10":10") pulsed CXL experiments

### *Oxygen concentrations during pulsed CXL treatment in normoxic and hyperoxic environments*

Intrastromal oxygen measurements in a normoxic and hyperoxic environment were performed and are shown in Figure 2 and Figure 3, respectively. Thereby, blue curves show the oxygen consumption during cross-linking with an irradiance of 9 mW/cm<sup>2</sup>, the pink curves are of

irradiance  $18 \text{ mW/cm}^2$  and the green curves represent the  $30 \text{ mW/cm}^2$  UV-irradiances. For both figures, subplots A and B represent the  $\text{O}_2$  consumption and rediffusion during the pulsing scheme of 10":10" for  $200 \mu\text{m}$  and  $300 \mu\text{m}$  respectively, while subplots C and D represent the  $\text{O}_2$  consumption and rediffusion for the asymmetrical pulsing scheme.

Once the UV irradiation was initiated, oxygen levels quickly descended. Table 1 shows the minimum values of the pulsing periods in percentage of oxygen and the total treatment time for the symmetrical and asymmetrical pulsing schemes, for hyperoxic and atmospheric oxygen environments. For the normoxic environment, the highest oxygen availability was found in the  $9 \text{ mW/cm}^2$  subgroups. In  $200 \mu\text{m}$  depth the minimum oxygen was 3.8% when the asymmetrical pulsing scheme was used (Figure 2 C). For higher irradiances and deeper corneal layers the oxygen levels were below the sensor's threshold. The statistical analysis for  $200 \mu\text{m}$  showed statistical significance between minimum oxygen values for 10":10" pulsing and optimized pulsing ( $p < 0.001$  between same irradiances) while for  $300 \mu\text{m}$  there was no statistical significance between the two pulsing schemes.



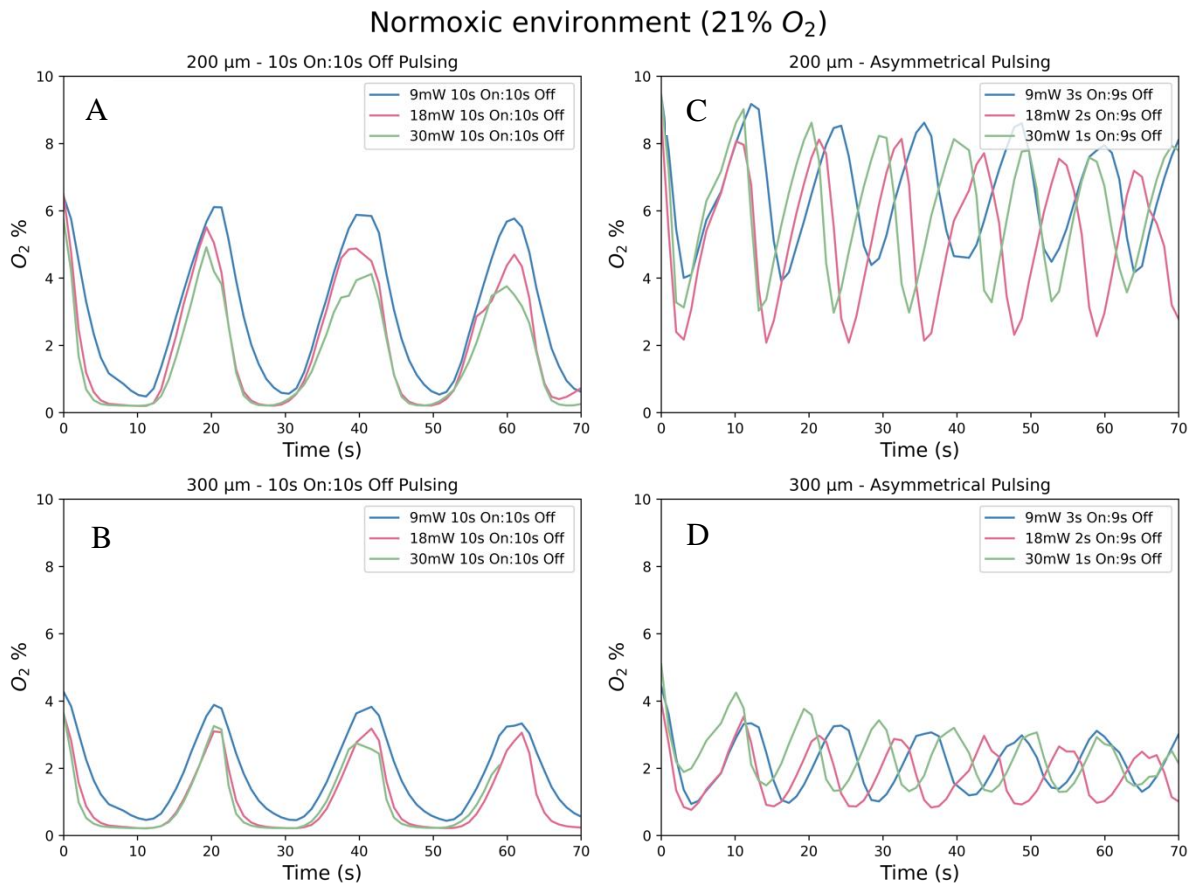

**Figure 2:** Average O<sub>2</sub> measurements for normoxic environment. Panels A and B represent the 10s:10s pulsing schemes whereas C and D represent the proposed asymmetrical pulsing scheme for 200 μm and 300 μm respectively

Hyperoxic environment significantly increased the stromal oxygen availability (Figure 3). In 200 μm depth the minimum oxygen was 42.0% when the asymmetrical pulsing scheme was used and 19.2% for the symmetrical pulsing. For higher irradiances and deeper corneal layers, decreasing oxygen levels were observed. During the UV-off time of the periods, oxygen levels were rediffusing to the initial levels. The post-hoc analysis between the two pulsing groups, in 200 μm showed  $p < 0.001$  between same irradiance groups. The same p-value was found for the 300 μm, when comparing the different pulsing schemes between same irradiances (9 and 18 mW/cm<sup>2</sup>) and for 30 mW/cm<sup>2</sup> the p-value was equal to 0.002.

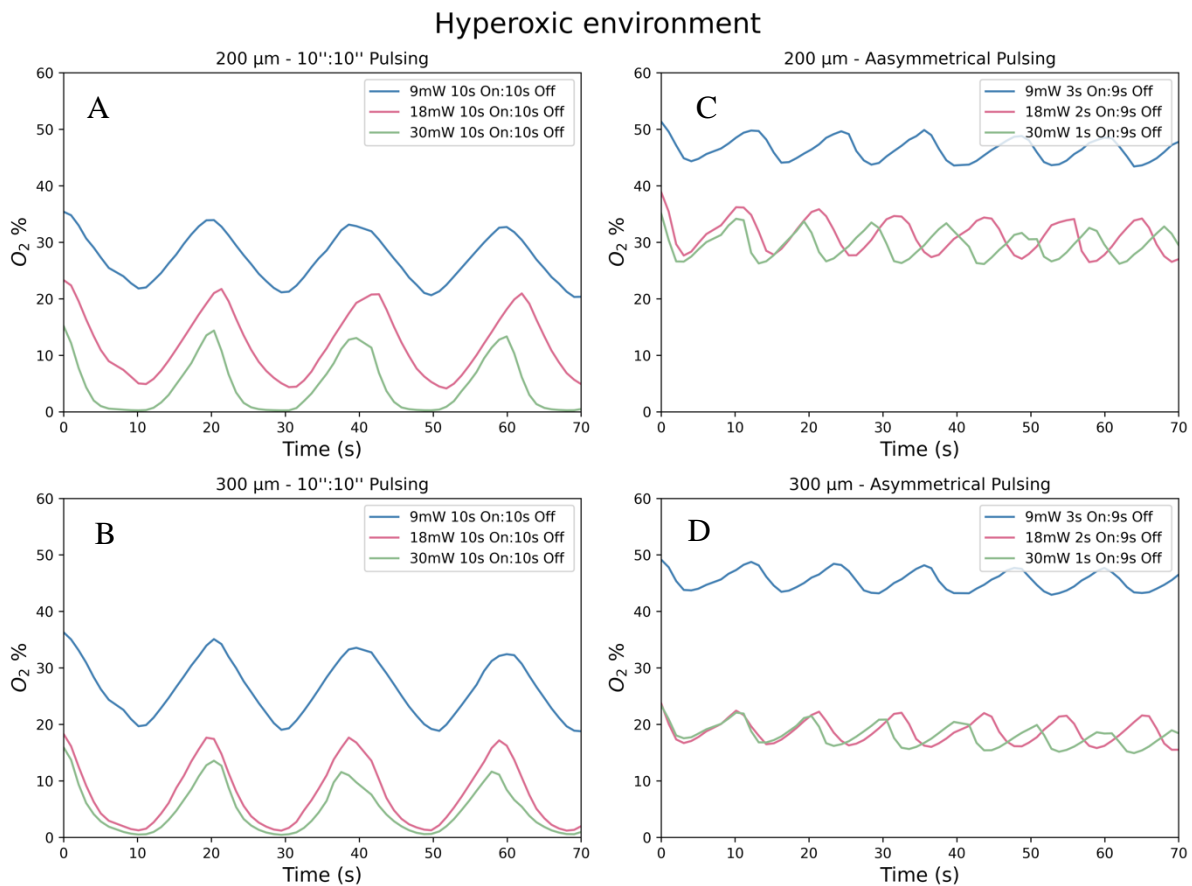

**Figure 3:** Average O<sub>2</sub> measurements for hyperoxic environment. Subfigures A and B represent the 10'' : 10'' pulsing schemes whereas C and D represent the proposed asymmetrical pulsing scheme for 200  $\mu\text{m}$  and 300  $\mu\text{m}$  respectively

#### *Minimum and maximum values for normoxic and hyperoxic environment*

Based on the minimum and maximum values of the periods, boxplots for 10'' : 10'' symmetrical pulsing and asymmetrical pulsing for 200  $\mu\text{m}$  and 300  $\mu\text{m}$  in normoxic and hyperoxic environment, respectively, were created (Figure 4 and Figure 5). Dark blue boxplots represented the highest values and light blue boxplots represented the lowest values of the periodic graphs for 200  $\mu\text{m}$ . Dark red boxplots represented the highest values and light red boxplots represented the lowest values of the periodic graphs for 300  $\mu\text{m}$ . For the 200  $\mu\text{m}$  depth of the left figure the same six eyes had been tested. Similarly, another set of six eyes had been tested for 300  $\mu\text{m}$  depth of the left figure. The same process was followed for the optimized pulsing scheme on the right figure.

For Figure 4 and the minimum values of the graphs' periods during 10":10" pulsing, the boxplots had almost the same median but different distributions. The boxplot for 9 mW/cm<sup>2</sup> at 200 μm had a wider third quartile, while the rest five were relatively short suggesting a high level of similarity between each other. All six of them were well below the sensor limit of one percent. The minimum values of the graphs' periods during asymmetrical pulsing showed an increase of the median for both 200 and 300 μm. The oxygen levels during asymmetrical pulsing were below the threshold limit for 9 and 18 mW/cm<sup>2</sup>, whereas for 30 mW/cm<sup>2</sup> it was 1.1% at 300 μm and therewith above it.

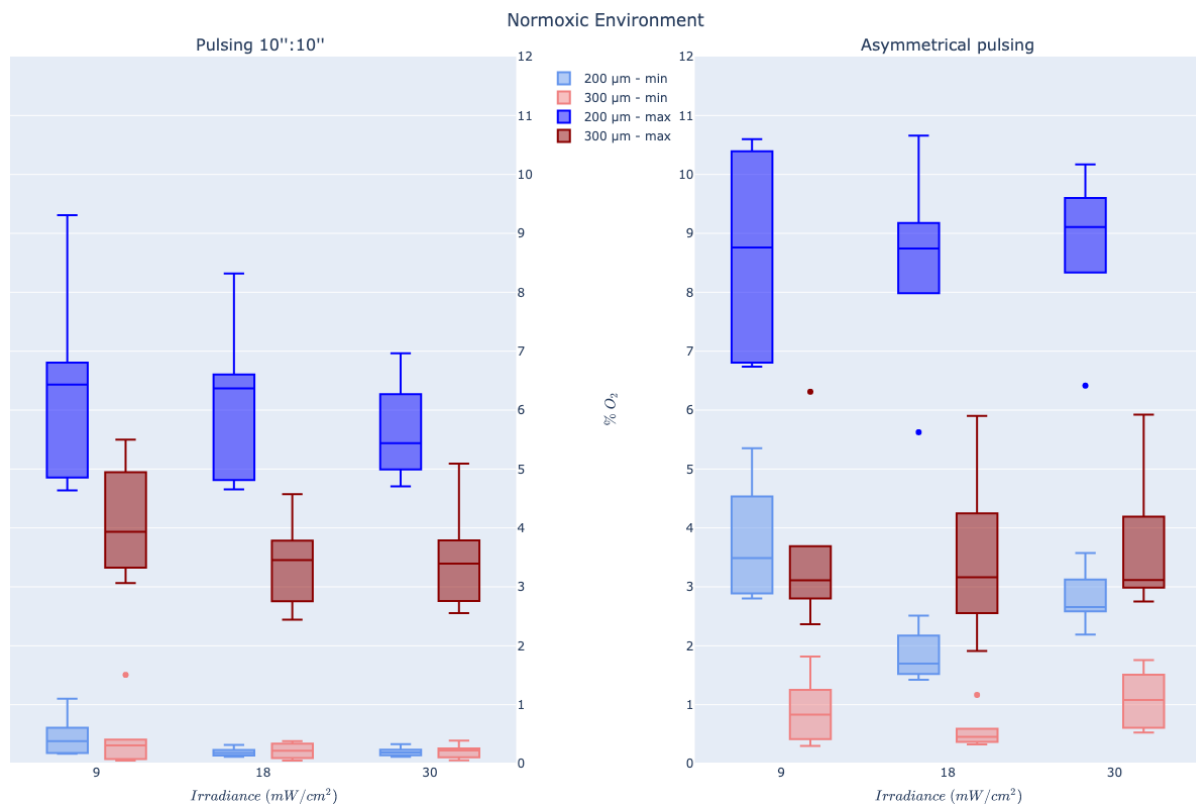

**Figure 4:** Boxplots for 10":10" pulsing (left) and asymmetrical pulsing (right) in normoxic environment for 200 μm and 300 μm. Dark blue boxplots represent the highest values and light blue boxplots represent the lowest values of the periodic graphs for 200 μm

Supplementary oxygen during treatment is increasing the available stroma oxygen, something that is shown in Figure 5.

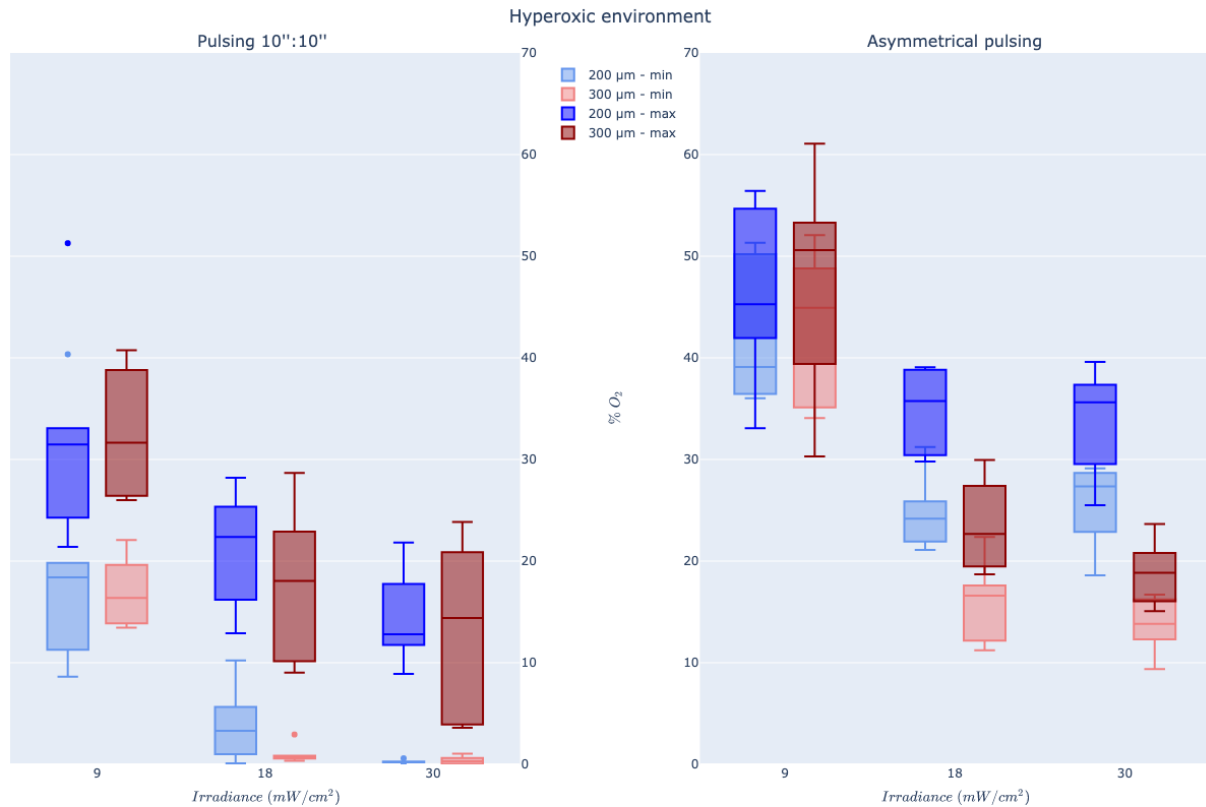

**Figure 5:** Boxplots for 10'':10'' pulsing (left) and asymmetrical pulsing (right) in hyperoxic environment for 200  $\mu\text{m}$  and 300  $\mu\text{m}$ . Dark blue boxplots represent the highest values and light blue boxplots represent the lowest values of the periodic graphs for 200  $\mu\text{m}$

For the minimum values of the graphs' periods during 10'':10'' pulsing, the medians for 9  $\text{mW}/\text{cm}^2$  were 18.4 and 16.3 for 200 and 300  $\mu\text{m}$ , respectively. These values are much higher than the normoxic environment for the same pulsing scheme. For 18  $\text{mW}/\text{cm}^2$  at 300  $\mu\text{m}$  depth and 30  $\text{mW}/\text{cm}^2$  for both depths, the boxplots are not widely spread with the values agreeing to each other and the medians are below one, indicating that there is not enough oxygen for cross-linking. On the other hand, for the asymmetrical pulsing scheme, for 9  $\text{mW}/\text{cm}^2$  at 200  $\mu\text{m}$  the median is located at 38%  $\text{O}_2$  while for the 300  $\mu\text{m}$  it is located at 45%.

*Experimental parameters for all experimentally tested groups*

Table 1 represents a summary of all experimental parameters, like irradiance, corneal depth, treatment time and the resulting minimum oxygen concentrations during the periods of treatment but are also compared to the continuous data that had been acquired from our previous work<sup>9</sup>. The minimum values of oxygen derive from computing the minimum values of each eye separately and the averaging them.

**Table 1:** Experimental parameters applied for each test group

| Irradiance<br>(mW/cm <sup>2</sup> ) | Depth<br>( $\mu$ m) | p-CXL<br>10":10" |                      |          | p-CXL asymmetrical |                      |          | Continuous    |                      |          |
|-------------------------------------|---------------------|------------------|----------------------|----------|--------------------|----------------------|----------|---------------|----------------------|----------|
|                                     |                     | Time<br>(min)    | min O <sub>2</sub> % |          | Time<br>(min)      | min O <sub>2</sub> % |          | Time<br>(min) | min O <sub>2</sub> % |          |
|                                     |                     |                  | Hyperoxic            | Normoxic |                    | Hyperoxic            | Normoxic |               | Hyperoxic            | Normoxic |
| <b>9</b>                            | 200                 | 20               | 19.2                 | < 1      | 40                 | 42.0                 | 3.8      | 10            | 2.6                  | < 1      |
|                                     | 300                 |                  | 17.0                 | < 1      |                    | 43.3                 | < 1      |               | 1.2                  | < 1      |
| <b>18</b>                           | 200                 | 10               | 3.9                  | < 1      | 27.5               | 24.7                 | 1.8      | 5             | < 1                  | < 1      |
|                                     | 300                 |                  | 1.0                  | < 1      |                    | 16.1                 | < 1      |               | < 1                  | < 1      |
| <b>30</b>                           | 200                 | 6                | < 1                  | < 1      | 30                 | 25.7                 | 2.8      | 3             | < 1                  | < 1      |
|                                     | 300                 |                  | < 1                  | < 1      |                    | 13.7                 | 1.1      |               | < 1                  | < 1      |

Oxygen dynamics are distinctly different when conducted under hyperoxic conditions. During normoxic treatment at 200  $\mu$ m depth with the 10":10" pulsing scheme, the oxygen depletes below the sensor's measuring limit in 8 seconds, 4 seconds and 3 seconds for 9 mW/cm<sup>2</sup>, 18 mW/cm<sup>2</sup> and 30 mW/cm<sup>2</sup>, respectively. For 300  $\mu$ m the O<sub>2</sub> depletes even faster. During hyperoxic treatment, the oxygen depletes below the sensor limit only for the irradiance of 30 mW/cm<sup>2</sup>, for both depths. For 200  $\mu$ m the O<sub>2</sub> depletes within 6 seconds and for 300  $\mu$ m the O<sub>2</sub> depletes in 8 seconds (Table 2). Interestingly, for the asymmetrical pulsing scheme the oxygen depletes below the threshold only for 9 and 18 mW/cm<sup>2</sup> at 300  $\mu$ m depth (Table 1).

**Table 2:** Irradiances, depths, time and protocols for which the O<sub>2</sub> percentage drops below the sensor's threshold limit.

| Irradiance<br>(mW/cm <sup>2</sup> ) | Depth<br>( $\mu$ m) | p-CXL<br>10":10"                        |          | p-CXL optimal                           |          |
|-------------------------------------|---------------------|-----------------------------------------|----------|-----------------------------------------|----------|
|                                     |                     | Below threshold depletion<br>time (sec) |          | Below threshold depletion<br>time (sec) |          |
|                                     |                     | Hyperoxic                               | Normoxic | Hyperoxic                               | Normoxic |
| <b>9</b>                            | 200                 | -                                       | 8        | -                                       | -        |
|                                     | 300                 | -                                       | 6        | -                                       | 4        |
| <b>18</b>                           | 200                 | -                                       | 4        | -                                       | -        |
|                                     | 300                 | -                                       | 3        | -                                       | 3        |
| <b>30</b>                           | 200                 | 6                                       | 3        | -                                       | -        |
|                                     | 300                 | 8                                       | 2        | -                                       | -        |

## Discussion

Oxygen is of great importance for the efficiency of CXL treatment. Indeed, previous studies have shown that performing CXL in a hyperoxic environment leads to an increase of available stroma oxygen and therefore a deeper and more effective treatment<sup>9,14</sup>. Simultaneously, previous studies have shown that p-CXL with a fluence of 7.2 J/cm<sup>2</sup> leads to a deeper apoptotic effect<sup>13,15,16</sup>. To our knowledge, the oxygen consumption during 10":10" and asymmetrical p-CXL with a fluence of 5.4 J/cm<sup>2</sup>, in normoxic and hyperoxic environments has never been examined before. The results presented here demonstrate that a stable hyperoxic environment during symmetrical but especially asymmetrical pulsed treatments can counteract challenges associated with maintaining aerobic conditions as oxygen is faster consumed in accelerated protocols. Even in corneal depths of 200 and 300  $\mu\text{m}$ , or higher irradiances like 9 – 30 mW/cm<sup>2</sup> the available oxygen is adequate for treatment.

The data for 10":10" p-CXL in normoxic environment demonstrate that, regardless of irradiance and depth, performing CXL in a symmetrical pulsed form with an energy of 5.4 J/cm<sup>2</sup> causes total depletion of stromal oxygen (Figure 2 A-B). During the rediffusion time in 200  $\mu\text{m}$ , the O<sub>2</sub> increases up to 6.41 %, 6.18 % and 5.63 % for 9, 18 and 30 mW/cm<sup>2</sup>. While, in 300  $\mu\text{m}$ , the O<sub>2</sub> increases up to 4.12 %, 3.41 % and 3.5% for the same irradiances. Given the treatment time that is needed for reaching the energy of 5.4 J/cm<sup>2</sup> this pulsing protocol does not provide adequate oxygen for fast and efficient treatment since the time needed is double comparing to normoxic A-CXL time (Table 1) and for both protocols the oxygen drops below the oxygen threshold. During the asymmetrical pulsing scheme (Figure 2 C) the availability of oxygen for 200  $\mu\text{m}$  corneal depth increases. During depletion time, the oxygen concentration does not decrease below 3.76 % for 9 mW/cm<sup>2</sup>, 1.84 % for 18 mW/cm<sup>2</sup> and 2.8 % for 30 mW/cm<sup>2</sup>. During rediffusion, the concentration reaches the maximum value of the period in 8.5 seconds, for all irradiances. On the other hand, for 300  $\mu\text{m}$  the lowest values of oxygen during depletion

are below the threshold limit (1%) showing no improvement comparing it to the 10":10" p-CXL (Figure 2 D).

The use of hyperoxic environment for 10":10" and asymmetrical p-CXL, significantly improves the availability of oxygen even in higher irradiances and deeper corneal layers, something that is not feasible with continuous irradiations. For the symmetrical, 10":10" scheme in 200  $\mu\text{m}$ , the minimum oxygen concentration lays at 19.2 % for 9  $\text{mW}/\text{cm}^2$ , at 3.9 % for 18  $\text{mW}/\text{cm}^2$  and below 1 % for 30  $\text{mW}/\text{cm}^2$  (Figure 3 A-B)

This corresponds to a 40-fold increase for 9  $\text{mW}/\text{cm}^2$  and a 20-fold increase for 18  $\text{mW}/\text{cm}^2$  when compared to the same depth and pulsing scheme, for normoxic environment. Simultaneously, the rediffusion concentration exhibits a 5-fold increase for 9  $\text{mW}/\text{cm}^2$ , a 3.4 fold increase for 18  $\text{mW}/\text{cm}^2$  and 2.5 fold increase for 30  $\text{mW}/\text{cm}^2$  comparing to the same depth and pulsing scheme, for normoxic environment. For 300  $\mu\text{m}$ , the minimum oxygen concentration lays at 16.97 % for 9  $\text{mW}/\text{cm}^2$  but for 18  $\text{mW}/\text{cm}^2$  and for 30  $\text{mW}/\text{cm}^2$  the amount of oxygen is well below the sensor's threshold. This shows that even hyperoxic environment is not adequate for CXL in layers deeper than 300  $\mu\text{m}$  and irradiances higher than 9  $\text{mW}/\text{cm}^2$ .

The asymmetrical pulsing scheme in hyperoxic environment (Figure 3 C-D) increases significantly the availability of oxygen. During oxygen depletion for 200  $\mu\text{m}$  corneal depth, the concentration does not drop below 42.3 % for 9  $\text{mW}/\text{cm}^2$ , 24.7 % for 18  $\text{mW}/\text{cm}^2$  and 25.7 % for 30  $\text{mW}/\text{cm}^2$ . During rediffusion, the concentration reaches 46.1 % for 9  $\text{mW}/\text{cm}^2$ , 34.9 % for 18  $\text{mW}/\text{cm}^2$  and 33.9 % for 30  $\text{mW}/\text{cm}^2$ . On the other hand, for 300  $\mu\text{m}$  the lowest values of oxygen during depletion are comparable to these of 200  $\mu\text{m}$ , showing significant improvement. During rediffusion, the concentration reaches 47.5 % for 9  $\text{mW}/\text{cm}^2$ , 23.48 % for 18  $\text{mW}/\text{cm}^2$  and 18.9 % for 30  $\text{mW}/\text{cm}^2$ .



An interesting issue arises from the use of asymmetrical pulsing. In both atmospheric and hyperoxic environments, the minimum oxygen concentrations for 30 mW/cm<sup>2</sup> in 200 μm corneal depth are slightly higher than the ones for 18 mW/cm<sup>2</sup>. For 300 μm this is noted only in the atmospheric environment. A suspected reason for these values might be the different “On” times used for the different irradiances. Moreover, for the 300 μm, the finding could be explained by the sensor’s threshold and the possibility of less accurate detection since it is very close to it.

Based on the different examined protocols, pulsing seems to be efficient only for hyperoxic environment. During the symmetrical 10":10" protocol, the 9 mW/cm<sup>2</sup> irradiance seems to be the optimal choice. For the asymmetrical pulsing, the irradiance of 9 and 30 mW/cm<sup>2</sup> exhibit the highest oxygen concentrations.

Despite these results, this study exhibits several limitations. The first one is the *ex vivo* nature of the experiments with porcine eyes, which may not resemble completely the physiological conditions within the cornea. Additionally, the sensitivity of the oxygen micro-sensor when measuring concentrations below 1%, limits conclusions for subtle oxygen changes. Moreover, there is a bigger variability of minimum and maximum period values for oxygen measurements in the hyperoxic environment which has been previously described<sup>17</sup>. Another limitation of the study is the absence of biomechanical tests to determine whether and how the different pulsing protocols affect corneal biomechanics. Moreover, the treatment times for asymmetrical p-CXL could potentially be a limitation for surgeons, however, the oxygen concentration availability could compensate for the treatment time. Finally, the numerical algorithm used here is unable to characterize the oxygen consumption/performance of continuous irradiance CXL. Therefore, the comparison between asymmetrical p-CXL and continuous CXL is based on two different computational algorithm. The suggested values by the algorithm are purely based on oxygen availability and time and do not include the formation of cross-links or the saturation of cross

links as a parameter and should be included in the future. For the hyperoxic situation, the algorithm must be further calibrated to suggest optimal values.

In conclusion, based on the different examined protocols, pulsing is efficient only for hyperoxic environment. During the symmetrical 10":10" protocol, the 9 mW/cm<sup>2</sup> irradiance appears to be the optimal choice. For the asymmetrical pulsing, the irradiance of 9 and 30 mW/cm<sup>2</sup> exhibit the highest oxygen concentrations. The results presented here provide new information on the oxygen kinetics during riboflavin-mediated symmetrical and asymmetrical p-CXL.

### **Acknowledgements**

We thank Avedro Inc. and Glaukos Corp. (Waltham, MA, USA) for the material support with Vibex rapid, Peschke Trade (Huenenberg, Switzerland) for the allocation of the PXL UV-source and Ziemer Ophthalmic Systems (Port, Switzerland) for their support with the channel creation using the Z8 laser system.

## References

1. Wollensak, G., Spoerl, E. & Seiler, T. Riboflavin/ultraviolet-a-induced collagen crosslinking for the treatment of keratoconus. *Am. J. Ophthalmol.* **135**, 620–627 (2003).
2. Raiskup, F., Theuring, A., Pillunat, L. E. & Spoerl, E. Corneal collagen crosslinking with riboflavin and ultraviolet-A light in progressive keratoconus: ten-year results. *J. Cataract Refract. Surg.* **41**, 41–46 (2015).
3. Hersh, P. S., Stulting, R. D., Muller, D., Durrie, D. S. & Rajpal, R. K. United States Multicenter Clinical Trial of Corneal Collagen Crosslinking for Keratoconus Treatment. *Ophthalmology* **124**, 1259–1270 (2017).
4. Hayes, S. *et al.* The Effect of Riboflavin/UVA Collagen Cross-linking Therapy on the Structure and Hydrodynamic Behaviour of the Ungulate and Rabbit Corneal Stroma. *PLoS One* **8**, 1–12 (2013).
5. Caporossi, A., Mazzotta, C., Baiocchi, S. & Caporossi, T. Long-term results of riboflavin ultraviolet a corneal collagen cross-linking for keratoconus in Italy: the Siena eye cross study. *Am. J. Ophthalmol.* **149**, 585–593 (2010).
6. Caporossi, A., Mazzotta, C., Baiocchi, S., Caporossi, T. & Denaro, R. Age-Related Long-Term Functional Results after Riboflavin UV A Corneal Cross-Linking. *J. Ophthalmol.* **2011**, 608041 (2011).
7. Raiskup-Wolf, F., Hoyer, A., Spoerl, E. & Pillunat, L. E. Collagen crosslinking with riboflavin and ultraviolet-A light in keratoconus: long-term results. *J. Cataract Refract. Surg.* **34**, 796–801 (2008).
8. Wittig-Silva, C. *et al.* A randomized controlled trial of corneal collagen cross-linking in progressive keratoconus: preliminary results. *J. Refract. Surg.* **24**, S720-5 (2008).
9. Seiler, T. G. *et al.* Oxygen Kinetics During Corneal Cross-linking With and Without Supplementary Oxygen. *Am. J. Ophthalmol.* **223**, 368–376 (2021).
10. Dervenis, N. *et al.* Accelerated, Pulsed Collagen Cross-Linking versus the Dresden Protocol in Keratoconus: A Case Series. *Med. Princ. Pract.* **29**, 332–337 (2020).
11. Jiang, L.-Z., Jiang, W. & Qiu, S.-Y. Conventional vs. pulsed-light accelerated corneal collagen cross-linking for the treatment of progressive keratoconus: 12-month results from a prospective study. *Exp. Ther. Med.* **14**, 4238–4244 (2017).
12. Toker, E., Çerman, E., Özcan, D. Ö. & Seferoğlu, Ö. B. Efficacy of different accelerated corneal crosslinking protocols for progressive keratoconus. *J. Cataract Refract. Surg.* **43**, 1089–1099 (2017).
13. Mazzotta, C., Traversi, C., Paradiso, A. L., Latronico, M. E. & Rechichi, M. Pulsed Light Accelerated Crosslinking versus Continuous Light Accelerated Crosslinking: One-Year Results. *J. Ophthalmol.* **2014**, 604731 (2014).
14. Faramarzi, A. *et al.* Systemic supplemental oxygen therapy during accelerated corneal crosslinking for progressive keratoconus: randomized clinical trial. *J. Cataract Refract. Surg.* **47**, 773–779 (2021).

15. Peyman, A., Nouralishahi, A., Hafezi, F., Kling, S. & Peyman, M. Stromal Demarcation Line in Pulsed Versus Continuous Light Accelerated Corneal Cross-linking for Keratoconus. *J. Refract. Surg.* **32**, 206–208 (2016).
16. Ziaei, M. *et al.* Prospective two-year study of clinical outcomes following epithelium-off pulsed versus continuous accelerated corneal crosslinking for keratoconus. *Clin. Experiment. Ophthalmol.* **47**, 980–986 (2019).
17. Hill, J. *et al.* Optimization of Oxygen Dynamics, UV-A Delivery, and Drug Formulation for Accelerated Epi-On Corneal Crosslinking. *Curr. Eye Res.* **45**, 450–458 (2020).

**Table 3:** Boxplots that represent significant difference (<0.05) between each other+

| Boxplot name & number                           | Normoxic environment                         |                                              | Hyperoxic environment                                          |                                            |
|-------------------------------------------------|----------------------------------------------|----------------------------------------------|----------------------------------------------------------------|--------------------------------------------|
|                                                 | Comparison of boxplots for min values        | Comparison of boxplots for max values        | Comparison of boxplots for min values                          | Comparison of boxplots for max values      |
| 1: 9 mW/cm <sup>2</sup> at 200 μm (10":10")     | 1 – 7<br>1 – 8<br>1 – 9                      | 1 – 5<br>1 – 6<br>1 – 10<br>1 – 11<br>1 – 12 | 1 – 2<br>1 – 3<br>1 – 5<br>1 – 6<br>1 – 7<br>1 – 10            | 1 – 3<br>1 – 6<br>1 – 10                   |
| 2: 18 mW/cm <sup>2</sup> at 200 μm (10":10")    | 2 – 7<br>2 – 8<br>2 – 9                      | 2 – 5<br>2 – 6<br>2 – 11                     | 2 – 4<br>2 – 7<br>2 – 8<br>2 – 9<br>2 – 10<br>2 – 11           | 2 – 7<br>2 – 10                            |
| 3: 30 mW/cm <sup>2</sup> at 200 μm (10":10")    | 3 – 7<br>3 – 8<br>3 – 9                      | 3 – 7<br>3 – 8<br>3 – 9                      | 3 – 4<br>3 – 7<br>3 – 8<br>3 – 9<br>3 – 10<br>3 – 11<br>3 – 12 | 3 – 4<br>3 – 7<br>3 – 8<br>3 – 9<br>3 – 10 |
| 4: 9 mW/cm <sup>2</sup> at 300 μm (10":10")     | 4 – 7<br>4 – 8<br>4 – 9                      | 4 – 7<br>4 – 8<br>4 – 9                      | 4 – 5<br>4 – 6<br>4 – 7<br>4 – 10                              | 4 – 5<br>4 – 6<br>4 – 10                   |
| 5: 18 mW/cm <sup>2</sup> at 300 μm (10":10")    | 5 – 7<br>5 – 8<br>5 – 9                      | 5 – 7<br>5 – 8<br>5 – 9                      | 5 – 7<br>5 – 8<br>5 – 9<br>5 – 10<br>5 – 11<br>5 – 12          | 5 – 7<br>5 – 8<br>5 – 9<br>5 – 10          |
| 6: 30 mW/cm <sup>2</sup> at 300 μm (10":10")    | 6 – 7<br>6 – 8<br>6 – 9                      | 6 – 7<br>6 – 8<br>6 – 9                      | 6 – 7<br>6 – 8<br>6 – 9<br>6 – 10<br>6 – 11<br>6 – 12          | 6 – 7<br>6 – 8<br>6 – 9<br>6 – 10          |
| 7: 9 mW/cm <sup>2</sup> at 200 μm (optimized)   | 7 – 8<br>7 – 9<br>7 – 10<br>7 – 11<br>7 – 12 | 7 – 10<br>7 – 11<br>7 – 12                   | 7 – 8<br>7 – 9<br>7 – 10<br>7 – 11<br>7 – 12                   | 7 – 11<br>7 – 12                           |
| 8: 18 mW/cm <sup>2</sup> at 200 μm (optimized)  | 8 – 9<br>8 – 11                              | 8 – 10<br>8 – 11<br>8 – 12                   | 8 – 9<br>8 – 12                                                | 8 – 12                                     |
| 9: 30 mW/cm <sup>2</sup> at 200 μm (optimized)  | 9 – 10<br>9 – 11<br>9 – 12                   | 9 – 10<br>9 – 11<br>9 – 12                   | 9 – 10<br>9 – 12                                               | 9 – 12                                     |
| 10: 9 mW/cm <sup>2</sup> at 300 μm (optimized)  | n.s.                                         | n.s.                                         | 10 – 11<br>10 – 12                                             | 10 – 11<br>10 – 12                         |
| 11: 18 mW/cm <sup>2</sup> at 300 μm (optimized) | n.s.                                         | n.s.                                         | n.s.                                                           | n.s.                                       |
| 12: 30 mW/cm <sup>2</sup> at 300 μm (optimized) | n.s.                                         | n.s.                                         | n.s.                                                           | n.s.                                       |
